# Supplementary material for: Vorasidenib and ivosidenib in IDH1-mutant low-grade glioma: a randomized, perioperative phase 1 trial
Source: PubMed Central journal article supplement (PMC10313524; doi:10.1038/s41591-022-02141-2), 2023-02-23
Supplement: 41591_2022_2141_MOESM1_ESM.pdf [file 41591_2022_2141_MOESM1_ESM.pdf]

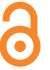

---

# **Vorasidenib and ivosidenib in IDH1-mutant low-grade glioma: a randomized, perioperative phase 1 trial**

---

In the format provided by the authors and unedited

---

## Supplementary tables

**Supplementary Table 1. Summary of pharmacokinetic parameters of vorasidenib and ivosidenib in tumor and plasma.\***

| Time of Surgery Sample                    | Tumor — ng/g     |                   |                   |                   | Plasma C <sub>avg</sub> — ng/ml |                  |                      |                      |
|-------------------------------------------|------------------|-------------------|-------------------|-------------------|---------------------------------|------------------|----------------------|----------------------|
|                                           | Vorasidenib      |                   | Ivosidenib        |                   | Vorasidenib                     |                  | Ivosidenib           |                      |
|                                           | 50 mg QD (N=9)   | 10 mg QD (N=9)    | 500 mg QD (N=11)  | 250 mg BID (N=9)  | 50 mg QD (N=10)                 | 10 mg QD (N=9)   | 500 mg QD (N=11)     | 250 mg BID (N=9)     |
| Geometric mean (range) drug concentration | 110 (59.8–190.0) | 66.7 (33.2–113.0) | 233 (105.0–604.0) | 278 (109.0–594.0) | 70 (31.6–144.0)                 | 22.4 (11.2–34.9) | 2618 (1762.0–3369.0) | 2435 (1597.0–3829.0) |
| Mean±SD brain-to-plasma ratio             | 1.69±0.55        | 2.92±1.13†        | 0.10±0.05         | 0.13±0.08†        |                                 |                  |                      |                      |

\*BID denotes twice daily, C<sub>avg</sub> average concentration over the dosing interval, and QD once daily.

†N=8.

**Supplementary Table 2. Summary of TEAEs.\***

|                                                    | Vorasidenib        |                    |                 | Ivosidenib          |                      |                 |
|----------------------------------------------------|--------------------|--------------------|-----------------|---------------------|----------------------|-----------------|
|                                                    | 50 mg QD<br>(N=14) | 10 mg QD<br>(N=10) | Total<br>(N=24) | 500 mg QD<br>(N=15) | 250 mg BID<br>(N=10) | Total<br>(N=25) |
| All patients — no. (%)†                            |                    |                    |                 |                     |                      |                 |
| Patients with ≥1 TEAE                              | 14 (100)           | 10 (100)           | 24 (100)        | 15 (100)            | 10 (100)             | 25 (100)        |
| Patients with treatment-related TEAE               | 10 (71.4)          | 4 (40.0)           | 14 (58.3)       | 12 (80.0)           | 5 (50.0)             | 17 (68.0)       |
| Patients with serious TEAEs                        | 3 (21.4)           | 1 (10.0)           | 4 (16.7)        | 4 (26.7)            | 1 (10.0)             | 5 (20.0)        |
| Patients with treatment-related serious TEAE       | 1 (7.1)            | 0                  | 1 (4.2)         | 0                   | 0                    | 0               |
| Patients with ≥1 grade ≥3 TEAE                     | 5 (35.7)           | 2 (20.0)           | 7 (29.2)        | 5 (33.3)            | 1 (10.0)             | 6 (24.0)        |
| Patients with ≥1 treatment-related grade ≥3 TEAE   | 1 (7.1)            | 1 (10.0)           | 2 (8.3)         | 1 (6.7)             | 0                    | 1 (4.0)         |
| Patients with ≥1 TEAE of special interest‡         | 2 (14.3)           | 0                  | 2 (8.3)         | 0                   | 0                    | 0               |
| Patients with TEAE leading to drug discontinuation | 0                  | 0                  | 0               | 1 (6.7)             | 0                    | 1 (4.0)         |
| Patients with TEAE leading to drug reduction       | 1 (7.1)            | 0                  | 1 (4.2)         | 0                   | 0                    | 0               |
| Patients with TEAE leading to drug interruption    | 3 (21.4)           | 2 (20.0)           | 5 (20.8)        | 3 (20.0)            | 0                    | 3 (12.0)        |

\*BID denotes twice daily, QD once daily, and TEAE treatment-emergent adverse event.

†Includes all patients who received at least one dose of ivosidenib or vorasidenib in the pre- or postoperative treatment period; untreated control patients are categorized according to postoperative treatment. Only TEAEs occurring on or after the first dose of study drug are included.

Any grade 3 or higher QT prolongation event in patients receiving ivosidenib, regardless of seriousness, were reported as a TEAE of special interest. Any grade 2 or worse alanine aminotransferase or aspartate aminotransferase elevation in patients receiving vorasidenib, regardless of seriousness, were reported as a TEAE of special interest.

Mellinghoff IK et al. Vorasidenib and ivosidenib in mutant *IDH1* glioma: a randomized, perioperative, phase I trial: Supplementary Tables

**Supplementary Table 3. 2-HG suppression pathways (C2).**

See separate spreadsheet file (Mellinghoff et al Supplemental Tables 3, 4 and 6.xlsx), tab 1

'Suppl T3 2-HG supp pathways C2'. *P* values adjusted for multiplicity as described in Methods.

NES denotes normalized enrichment score, padj adjusted *P* value, pval *P* value.

Mellinghoff IK et al. Vorasidenib and ivosidenib in mutant *IDH1* glioma: a randomized, perioperative, phase I trial: Supplementary Tables

**Supplementary Table 4. 2-HG suppression pathways (Hallmark).**

See separate spreadsheet file (Mellinghoff et al Supplemental Tables 3, 4 and 6.xlsx), tab 2

'Suppl T4 2-HG suppr paths Hallm'. *P* values adjusted for multiplicity as described in Methods.

NES denotes normalized enrichment score, padj adjusted *P* value, pval *P* value.

**Supplementary Table 5. Tumor response by response assessment in neuro-oncology criteria for low-grade gliomas according to the investigator.\***

|                                                | Vorasidenib             |                        |                         | Ivosidenib              |                        |                         |
|------------------------------------------------|-------------------------|------------------------|-------------------------|-------------------------|------------------------|-------------------------|
|                                                | 50 mg QD<br>(N=14)      | 10 mg QD<br>(N=10)     | Total<br>(N=24)         | 500 mg QD<br>(N=14)     | 250 mg BID<br>(N=8)    | Total<br>(N=22)         |
| Best overall response — no. (%)                |                         |                        |                         |                         |                        |                         |
| Complete response                              | 0                       | 0                      | 0                       | 0                       | 0                      | 0                       |
| Partial response                               | 2 (14.3)                | 0                      | 2 (8.3)                 | 3 (21.4)                | 1 (12.5)               | 4 (18.2)                |
| Minor response                                 | 4 (28.6)                | 1 (10.0)               | 5 (20.8)                | 2 (14.3)                | 0                      | 2 (9.1)                 |
| Stable disease                                 | 6 (42.9)                | 8 (80.0)               | 14 (58.3)               | 9 (64.3)                | 5 (62.5)               | 14 (63.6)               |
| Progressive disease                            | 2 (14.3)                | 1 (10.0)               | 3 (12.5)                | 0                       | 2 (25.0)               | 2 (9.1)                 |
| Objective response rate† — no. (%)<br>[95% CI] | 6 (42.9)<br>[17.7–71.1] | 1 (10.0)<br>[0.3–44.5] | 7 (29.2)<br>[12.6–51.1] | 5 (35.7)<br>[12.8–64.9] | 1 (12.5)<br>[0.3–52.7] | 6 (27.3)<br>[10.7–50.2] |

\*BID denotes twice daily, and QD once daily.

†Complete response, partial response, or minor response.

Mellinghoff IK et al. Vorasidenib and ivosidenib in mutant *IDH1* glioma: a randomized, perioperative, phase I trial: Supplementary Tables

**Supplementary Table 6. Response analysis (Hallmark).**

See separate spreadsheet file (Mellinghoff et al Supplemental Tables 3, 4 and 6.xlsx), tab 3

'Suppl T6 Response analysis Hall'. *P* values adjusted for multiplicity as described in Methods.

NES denotes normalized enrichment score, padj adjusted *P* value, pval *P* value.
